# Supplementary material for: Biohybrid Bovine Bone Matrix for Controlled Release of Mesenchymal Stem/Stromal Cell Lyosecretome: A Device for Bone Regeneration
Source: PubMed Central journal article supplement (PMC8071018; doi:10.3390/ijms22084064), 2021-04-14
Supplement: ijms-22-04064-s001.pdf [file ijms-22-04064-s001.pdf]

# Biohybrid Bovine Bone Matrix for Controlled Release of Mesenchymal Stem/Stromal Cell Lyosecretome: a Device for Bone Regeneration

Elia Bari <sup>1#</sup>, Ilaria Roato <sup>2#</sup>, Giuseppe Perale <sup>3,4,5</sup>, Filippo Rossi <sup>6</sup>, Tullio Genova <sup>7</sup>, Federico Mussano <sup>2</sup>, Riccardo Ferracini <sup>8</sup>, Marzio Sorlini <sup>9,10</sup>, Maria Luisa Torre <sup>1,10\*</sup>, Sara Perteghella <sup>1,10</sup>

<sup>1</sup> Department of Drug Sciences, University of Pavia, Viale Taramelli 12, I-27100 Pavia, Italy; elia.bari@unipv.it (E.B.); sara.perteghella@unipv.it (S.P.); marina.torre@unipv.it (M.L.T.)

<sup>2</sup> CIR-Dental School, Department of Surgical Sciences, University of Torino, Via Nizza 230, 10126 Torino Italy; ilaria.roato@unito.it (I.R.); federico.mussano@unito.it (F.M.)

<sup>3</sup> Industrie Biomediche Insubri SA, via Cantonale 67, 6805 Mezzovico-Vira, Switzerland; giuseppe@ibi-sa.com (G.P.)

<sup>4</sup> Faculty of Biomedical Sciences, University of Southern Switzerland (USI), Via G. Buffi 13, 6900 Lugano, Switzerland

<sup>5</sup> Ludwig Boltzmann Institute for Experimental and Clinical Traumatology, Donaueschingenstrasse 13, 1200 Vienna, Austria

<sup>6</sup> Department of Chemistry, Materials and Chemical Engineering "Giulio Natta", Politecnico di Milano, via Mancinelli 7, 20131 Milano, Italy; filippo.rossi@polimi.it

<sup>7</sup> Department of Life Sciences and Systems Biology, University of Torino, Via Accademia Albertina 13, 10123 Torino, Italy; tullio.genova@unito.it

<sup>8</sup> Department of Surgical Sciences and Integrated Diagnostics, University of Genova, Viale Benedetto XV 6, 16132 Genova, Italy; ferracini@edu.unige.it

<sup>9</sup> SUPSI - Department of Innovative Technologies, Lugano University Centre, Campus Est, Via la Santa 1, 6962 Viganello, Switzerland; marzio.sorlini@supsi.ch

<sup>10</sup> PharmaExceed Srl, Piazza Castello 19, I-27100 Pavia, Italy

\* Correspondence: marina.torre@unipv.it; Tel.: +390382987779

# Equally contributed to the work.

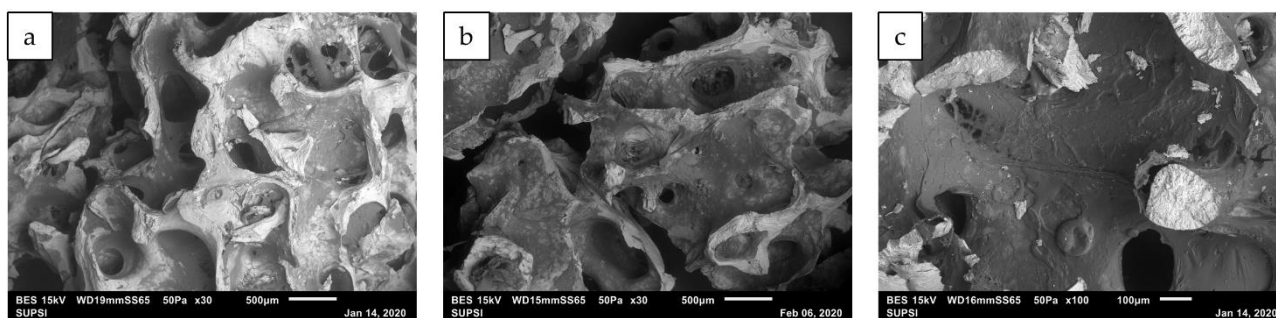

**Figure S1.** Morphological investigation by ESEM of SmartBone<sup>®</sup> loaded with 0.1% *w/v* poloxamer 407 (a-c). SEM images were taken at increasing magnifications (30× and 100×). Scale bar: 500 and 100 µm.
